# Supplementary material for: PrOnto database : GO term functional dissimilarity inferred from biological data
Source: Front Genet. 2015 Jun 3;6:200. doi: 10.3389/fgene.2015.00200 (PMC4452890; doi:10.3389/fgene.2015.00200)
Supplement: Supplementary Table 2 — List of experimental methods identifying binary protein-protein interactions. [file Table2.XLSX]

## Sheet: Suppl.Table_2
MI:0008	array technology
MI:0009	bacterial display
MI:0010	beta galactosidase complementation
MI:0011	beta lactamase complementation
MI:0012	bioluminescence resonance energy transfer
MI:0013	biophysical
MI:0014	adenylate cyclase complementation
MI:0016	circular dichroism
MI:0017	classical fluorescence spectroscopy
MI:0018	two hybrid
MI:0020	transmission electron microscopy
MI:0030	cross-linking study
MI:0031	protein cross-linking with a bifunctional reagent
MI:0034	display technology
MI:0040	electron microscopy
MI:0041	electron nuclear double resonance
MI:0042	electron paramagnetic resonance
MI:0043	electron resonance
MI:0047	far western blotting
MI:0048	filamentous phage display
MI:0049	filter binding
MI:0051	fluorescence technology
MI:0052	fluorescence correlation spectroscopy
MI:0053	fluorescence polarization spectroscopy
MI:0055	fluorescent resonance energy transfer
MI:0065	isothermal titration calorimetry
MI:0066	lambda phage display
MI:0073	mrna display
MI:0081	peptide array
MI:0084	phage display
MI:0089	protein array
MI:0090	protein complementation assay
MI:0091	chromatography technology
MI:0092	protein in situ array
MI:0095	proteinchip(r) on a surface-enhanced laser desorption/ionization
MI:0097	reverse ras recruitment system
MI:0098	ribosome display
MI:0099	scintillation proximity assay
MI:0107	surface plasmon resonance
MI:0108	t7 phage display
MI:0111	dihydrofolate reductase reconstruction
MI:0112	ubiquitin reconstruction
MI:0114	x-ray crystallography
MI:0115	yeast display
MI:0226	ion exchange chromatography
MI:0227	reverse phase chromatography
MI:0231	mammalian protein protein interaction trap
MI:0232	transcriptional complementation assay
MI:0255	post transcriptional interference
MI:0369	lex-a dimerization assay
MI:0370	tox-r dimerization assay
MI:0397	two hybrid array
MI:0398	two hybrid pooling approach
MI:0399	two hybrid fragment pooling approach
MI:0400	affinity technology
MI:0401	biochemical
MI:0405	competition binding
MI:0406	deacetylase assay
MI:0410	electron tomography
MI:0411	enzyme linked immunosorbent assay
MI:0415	enzymatic study
MI:0416	fluorescence microscopy
MI:0419	gtpase assay
MI:0420	kinase homogeneous time resolved fluorescence
MI:0423	in-gel kinase assay
MI:0424	protein kinase assay
MI:0425	kinase scintillation proximity assay
MI:0426	light microscopy
MI:0428	imaging technique
MI:0432	one hybrid
MI:0434	phosphatase assay
MI:0435	protease assay
MI:0437	protein three hybrid
MI:0440	saturation binding
MI:0508	deacetylase radiometric assay
MI:0509	phosphatase homogeneous time resolved fluorescence
MI:0510	homogeneous time resolved fluorescence
MI:0511	protease homogeneous time resolved fluorescence
MI:0512	zymography
MI:0513	collagen film assay
MI:0514	in gel phosphatase assay
MI:0515	methyltransferase assay
MI:0516	methyltransferase radiometric assay
MI:0655	lambda repressor two hybrid
MI:0657	systematic evolution of ligands by exponential enrichment
MI:0678	antibody array
MI:0695	sandwich immunoassay
MI:0696	polymerase assay
MI:0726	reverse two hybrid
MI:0727	lexa b52 complementation
MI:0728	gal4 vp16 complementation
MI:0809	bimolecular fluorescence complementation
MI:0813	proximity enzyme linked immunosorbent assay
MI:0824	x-ray powder diffraction
MI:0825	x-ray fiber diffraction
MI:0827	x-ray tomography
MI:0841	phosphotransferase assay
MI:0870	demethylase assay
MI:0872	atomic force microscopy
MI:0879	nucleoside triphosphatase assay
MI:0880	atpase assay
MI:0887	histone acetylase assay
MI:0889	acetylase assay
MI:0892	solid phase assay
MI:0894	electron diffraction
MI:0895	protein kinase A complementation
MI:0899	p3 filamentous phage display
MI:0900	p8 filamentous phage display
MI:0905	amplified luminescent proximity homogeneous assay
MI:0916	lexa vp16 complementation
MI:0920	ribonuclease assay
MI:0921	surface plasmon resonance array
MI:0946	ping
MI:0947	bead aggregation assay
MI:0949	gdp/gtp exchange assay
MI:0953	polymerization
MI:0968	biosensor
MI:0969	bio-layer interferometry
MI:0972	phosphopantetheinylase assay
MI:0976	total internal reflection fluorescence spectroscopy
MI:0979	oxidoreductase assay
MI:0984	deaminase assay
MI:0989	amidase assay
MI:0990	cleavage assay
MI:0991	lipid cleavage assay
MI:0992	defarnesylase assay
MI:0993	degeranylase assay
MI:0994	demyristoylase assay
MI:0995	depalmitoylase assay
MI:0996	deformylase assay
MI:0997	ubiquitinase assay
MI:0998	deubiquitinase assay
MI:0999	formylase assay
MI:1000	hydroxylase assay
MI:1001	lipidase assay
MI:1002	myristoylase assay
MI:1003	geranylgeranylase assay
MI:1004	palmitoylase assay
MI:1005	adp ribosylase assay
MI:1006	deglycosylase assay
MI:1007	glycosylase assay
MI:1008	sumoylase assay
MI:1009	desumoylase assay
MI:1010	neddylase assay
MI:1011	deneddylase assay
MI:1016	fluorescence recovery after photobleaching
MI:1019	protein phosphatase assay
MI:1024	scanning electron microscopy
MI:1026	diphtamidase assay
MI:1030	excimer fluorescence
MI:1031	protein folding/unfolding
MI:1036	nucleotide exchange assay
MI:1037	Split renilla luciferase complementation
MI:1038	silicon nanowire field-effect transistor
MI:1087	monoclonal antibody blockade
MI:1088	phenotype-based detection assay
MI:1089	nuclear translocation assay
MI:1111	two hybrid bait or prey pooling approach
MI:1112	two hybrid prey pooling approach
MI:1113	two hybrid bait and prey pooling approach
MI:1137	carboxylation assay
MI:1138	decarboxylation assay
MI:1142	aminoacylation assay
MI:1145	phospholipase assay
MI:1147	ampylation assay
